# Supplementary material
Source: PubMed Central journal article supplement (PMC2823989)
Supplement: NIHMS156296-supplement-01.pdf [file NIHMS156296-supplement-01.pdf]

# Well-defined Block Copolymers for Gene Delivery to Dendritic Cells: Probing the Effect of Polycation Chain-length

Rupei Tang, R. Noelle Palumbo, Lakshmi Nagarajan, Emily Krogstad, Chun Wang\*

Department of Biomedical Engineering, University of Minnesota, Minneapolis, MN 55455, USA

\* Corresponding author: wangx504@umn.edu, Tel: (612) 626-3990, Fax: (612) 626-6583

## Supplementary Materials

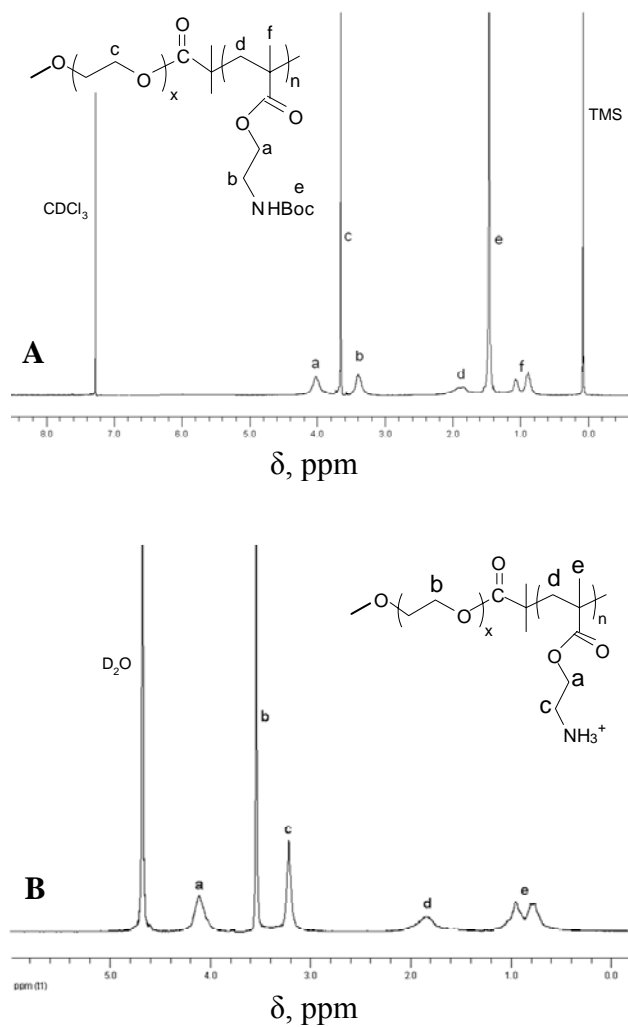

**Fig. S1.** The <sup>1</sup>H-NMR spectra of block copolymers PEG-*b*-PtBAM (A) in CDCl<sub>3</sub> and PEG-*b*-PAEM (B) in D<sub>2</sub>O.

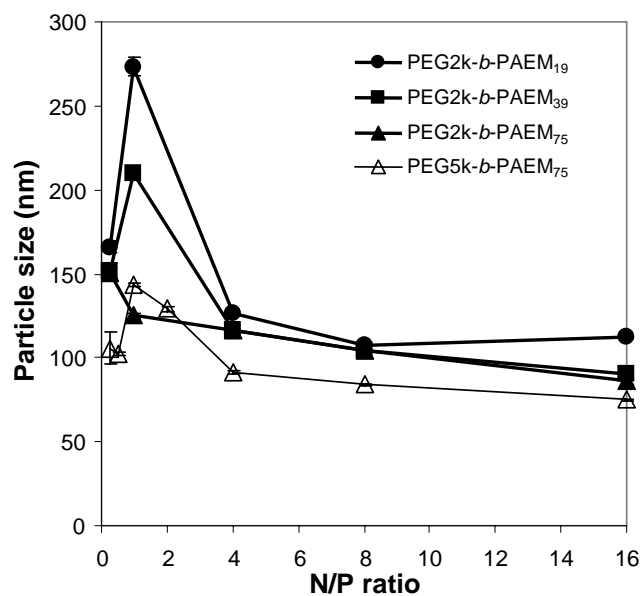

**Fig. S2.** The average particle size of polyplexes at various N:P ratios. Comparing PEG5k-*b*-PAEM75 with PEG2k-*b*-PAEM75, it is noted that the difference in particle size at N:P ratio of 1:1 is quite small, whereas the difference is much more pronounced among polymers with the same PEG block but different PAEM block.

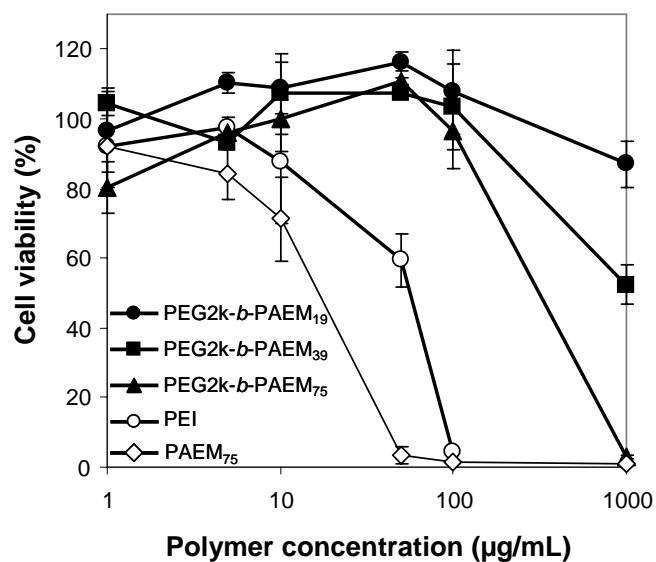

**Fig. S3.** Cytotoxicity of polymers to DC 2.4 cells determined by MTT assay.
